# Supplementary material for: Integrated Strategy for Informative Profiling and Accurate Quantification of Key-Volatiles in Dried Fruits and Nuts: An Industrial Quality Control Perspective
Source: MDPI journal article supplement (doi:10.3390/foods11193111), 2022-10-06
Supplement: s1 [file s1]

Supplementary material

# Integrated Strategy for Informative Profiling and Accurate Quantification of Key-Volatiles in Dried Fruits and Nuts: An Industrial Quality Control Perspective

Andrea Caratti, Simone Squara, Federico Stilo, Sonia Battaglini, Erica Liberto, Irene Cincera, Giuseppe Genova, Nicola Spigolon, Carlo Bicchi and Chiara Cordero

**Supplementary Table S1:** List of VOCs putatively identified in analyzed samples together with the CAS Registry Number, experimental  $I^r$  determined on a polar stationary phase (i.e., Heavy-Wax from Agilent Technologies – equivalent to Carbowax 20M), odor quality and presence in the specified sample.

| Compound Name                 | CAS        | $I^r$ | Odor Quality              | Walnut | Almond | Pineapple |
|-------------------------------|------------|-------|---------------------------|--------|--------|-----------|
| Pentane                       | 109-66-0   | 500   |                           | x      | x      |           |
| Hexane                        | 110-54-3   | 600   |                           | x      | x      |           |
| Methanethiol                  | 74-93-1    | 688   | Boiled cabbage            |        |        | x         |
| Heptane                       | 142-82-5   | 700   |                           | x      |        |           |
| 2-Methyl-pentane              | 107-83-5   | 754   |                           | x      | x      |           |
| Octane                        | 111-65-9   | 800   |                           |        |        | x         |
| Acetone                       | 67-64-1    | 814   |                           |        |        | x         |
| 2-Octene                      | 111-67-1   | 854   |                           | x      | x      |           |
| Butanal                       | 123-72-8   | 877   | Chocolate, cocoa          | x      | x      |           |
| Ethyl acetate                 | 141-78-6   | 899   | Ethereal, fruity          | x      | x      | x         |
| 2-Butanone                    | 78-93-3    | 903   | Ethereal, fruity          | x      | x      | x         |
| 2-Methyl-butanal              | 96-17-3    | 915   | Malty, dark chocolate     | x      | x      | x         |
| Isopropyl alcohol             | 67-63-0    | 920   |                           | x      | x      |           |
| 3-Methyl-butanal              | 590-86-3   | 927   | Malty, dark chocolate     | x      | x      | x         |
| Ethanol                       | 64-17-5    | 937   |                           | x      | x      | x         |
| Propanoic acid, ethyl ester   | 105-37-3   | 951   | Etherial, fruity, sweet   |        |        | x         |
| 2-Ethyl-furan                 | 3208-16-0  | 955   | Chemical, beany           | x      |        |           |
| Pentanal                      | 110-62-3   | 973   | Fermented, winey          | x      | x      | x         |
| Butyl ether                   | 142-96-1   | 974   |                           | x      |        | x         |
| Dibutyl ether                 | 142-96-1   | 974   |                           |        | x      |           |
| 2,3-Butanedione               | 431-03-8   | 980   | Sweet, buttery, creamy    |        |        | x         |
| 2-Propenoic acid, ethyl ester | 140-88-5   | 980   |                           |        |        | x         |
| 2-Pentanone                   | 107-87-9   | 983   | Fruity, banana            | x      |        |           |
| Acetic acid, sec-butyl ester  | 105-46-4   | 988   |                           | x      |        |           |
| Butanoic acid, methyl ester   | 623-42-7   | 992   | Fruity, banana, pineapple |        |        | x         |
| Decane                        | 124-18-5   | 1000  |                           | x      | x      | x         |
| $\alpha$ -Pinene              | 80-56-8    | 1024  | Herbal, woody             | x      | x      |           |
| $\beta$ -Ocimene              | 13877-91-3 | 1031  | Floral, green             |        |        | x         |
| Toluene                       | 108-88-3   | 1034  |                           | x      | x      | x         |
| Isovaleric acid, ethyl ester  | 108-64-5   | 1064  |                           |        |        | x         |
| Dimethyl disulfide            | 624-92-0   | 1065  | Sulfurous, cabbage, onion |        |        | x         |
| Camphene                      | 79-92-5    | 1068  |                           |        | x      |           |

|                                        |            |      |                          |   |   |   |
|----------------------------------------|------------|------|--------------------------|---|---|---|
| Butanoic acid, 2-methyl-, ethyl ester  | 7452-79-1  | 1073 | Fruity, fresh, pineapple |   |   | x |
| Hexanal                                | 66-25-1    | 1080 | Green, cut grass         | x | x | x |
| Pentanoic acid, methyl ester           | 624-24-8   | 1081 | Apple, pineapple         |   |   | x |
| Isobutyl alcohol                       | 78-83-1    | 1086 |                          | x |   |   |
| Isobutyl isobutyrate                   | 97-85-8    | 1094 |                          | x | x |   |
| 2-Methyl-2-butenal                     | 1115-11-3  | 1097 | Cocoa, phenolic          | x |   |   |
| (E)-2-Pentenal                         | 1576-86-9  | 1103 | Green fruity apple       | x |   |   |
| $\beta$ -Pinene                        | 127-91-3   | 1113 | Herbal, pine             | x | x |   |
| Isoamyl acetate                        | 123-92-2   | 1115 | Sweet, banana            |   |   | x |
| Ethylbenzene                           | 100-41-4   | 1116 | Phenol, spice            | x |   |   |
| p-Xylene                               | 106-42-3   | 1129 |                          | x | x | x |
| 1-Butanol                              | 71-36-3    | 1134 | Fruity, balsamic         | x | x | x |
| Pentanoic acid, ethyl ester            | 539-82-2   | 1134 | Sweet, fruity, acidic    |   |   | x |
| 1-Methoxy-2-propanol                   | 107-98-2   | 1135 |                          |   | x |   |
| 2-Butylfuran                           | 4466-24-4  | 1138 |                          | x |   |   |
| $\delta$ -3-Carene                     | 13466-78-9 | 1144 | Citrus, terpenic         | x | x | x |
| Propanoic acid, 2-methyl-, butyl ester | 97-87-0    | 1154 | Fruity, tropical, banana |   |   | x |
| $\beta$ -Myrcene                       | 123-35-3   | 1161 | Spicy, peppery           |   | x | x |
| 2-Methyl-2-pentenal                    | 623-36-9   | 1177 | Green, pungent           | x |   |   |
| Hexanoic acid, methyl ester            | 106-70-7   | 1184 | Fruity, apricot          |   |   | x |
| Heptanal                               | 111-71-7   | 1185 | Green, fresh             | x | x | x |
| o-Xylene                               | 95-47-6    | 1186 | Geranium                 | x | x |   |
| Dodecane                               | 112-40-3   | 1200 |                          | x |   | x |
| Limonene                               | 138-86-3   | 1205 | Citrus                   | x | x | x |
| 1,8-Cineole                            | 470-82-6   | 1212 |                          | x | x |   |
| $\beta$ -Phellandrene                  | 555-10-2   | 1215 |                          | x | x |   |
| 2-Ethyl-2-hexenal                      | 123-05-7   | 1216 |                          | x | x | x |
| 2-Ethyl-hexanal                        | 123-05-7   | 1216 |                          | x | x |   |
| Isoamyl alcohol                        | 123-51-3   | 1217 | Fruity banana            | x | x | x |
| (E)-2-Hexenal                          | 6728-26-3  | 1220 | Green, leaf              |   | x | x |
| Butanoic acid, butyl ester             | 109-21-7   | 1221 | Sweet fruity ethereal    | x | x | x |
| 2-Hexenal                              | 505-57-7   | 1225 |                          | x |   |   |
| 2-Pentyl-furan                         | 3777-69-3  | 1230 | Fruity, vegetable        | x | x |   |
| Hexanoic acid, ethyl ester             | 123-66-0   | 1232 | Fruity, pineapple        |   |   | x |
| 1-Pentanol                             | 71-41-0    | 1252 | Fermented, fusel         | x | x |   |
| m-Cymene                               | 535-77-3   | 1267 |                          |   | x |   |
| p-Cymene                               | 99-87-6    | 1272 | Terpenic, wood           | x | x | x |
| Isoamyl-2-methyl butyrate              | 27625-35-0 | 1274 |                          |   |   | x |
| Acetoin                                | 513-86-0   | 1280 | Buttery, creamy          |   |   | x |
| 2-Octanone                             | 111-13-7   | 1287 | Dairy, waxy              | x |   |   |
| $\alpha$ -Terpinolene                  | 586-62-9   | 1288 |                          |   |   | x |
| Octanal                                | 124-13-0   | 1289 | Pungent, orange          | x | x | x |
| 3-Hexenoic acid, ethyl ester           | 2396-83-0  | 1290 | Fruity, pineapple        |   |   | x |
| 1-Octen-3-one                          | 4312-99-6  | 1305 | Mushroom, metal          |   | x | x |
| (E)-2-Heptenal                         | 18829-55-5 | 1334 | Green, sweet             | x | x | x |
| 6-Methyl-5-hepten-2-one                | 110-93-0   | 1337 | Citrus, lemongrass       | x | x | x |

|                                           |             |      |                         |   |   |   |
|-------------------------------------------|-------------|------|-------------------------|---|---|---|
| 4-Hydroxy-4-methyl-2-pentanone            | 123-42-2    | 1352 |                         |   |   | x |
| 1-Hexanol                                 | 111-27-3    | 1363 | Herbal, ethereal        | x | x | x |
| Dimethyl trisulfide                       | 3658-80-8   | 1373 |                         |   |   | x |
| Nonanal                                   | 124-19-6    | 1398 | Aldehydic, rose         | x | x | x |
| 2-Butoxy ethanol                          | 111-76-2    | 1405 |                         | x | x | x |
| Butanoic acid, hexyl ester                | 2639-63-6   | 1406 |                         | x | x |   |
| Amilfenol                                 | 80-46-6     | 1417 |                         |   |   | x |
| (E)-2-Octenal                             | 2548-87-0   | 1434 | Fatty, cucumber         | x | x | x |
| Octanoic acid, ethyl ester                | 106-32-1    | 1440 | Fruity, winey           |   |   | x |
| Acetic acid                               | 64-19-7     | 1449 | Sour, vinegar           | x | x | x |
| 1-Octen-3-ol                              | 3391-86-4   | 1451 | Earthy, mushroom        | x | x |   |
| 1-Heptanol                                | 111-70-6    | 1465 | Green, leafy            | x | x | x |
| Methional                                 | 3268-49-3   | 1466 | Cooked potatoes         |   |   | x |
| 4-Octenoic acid, ethyl ester              | 138234-61-4 | 1470 |                         |   |   | x |
| 2H-Furan-3-one, 2,5-dimethyl              | 14400-67-0  | 1483 |                         |   |   | x |
| 2-Ethyl-1-hexanol                         | 104-76-7    | 1484 | Citrus, fresh           | x | x |   |
| $\alpha$ -Copaene                         | 3856-25-5   | 1488 | Spicy, woody            |   |   | x |
| $\alpha$ -Muurolene                       | 10208-80-7  | 1497 | Woody                   |   |   | x |
| Decanal                                   | 112-31-2    | 1498 | Waxy, fatty, sweet      | x | x | x |
| 2-Acetylfuran                             | 1192-62-7   | 1501 |                         |   |   | x |
| 3-(Methylthio)propanoic acid methyl ester | 13532-18-8  | 1510 | Sulfurous, onion        |   |   | x |
| Benzaldehyde                              | 100-52-7    | 1520 | Sweet, marzipan, fruity | x | x | x |
| $\alpha$ -Gurjunene                       | 489-40-7    | 1520 |                         |   |   | x |
| Propanoic acid                            | 79-09-4     | 1534 |                         |   |   | x |
| (E)-2-Nonenal                             | 18829-56-6  | 1540 | Green grass             | x | x | x |
| 1-Octanol                                 | 111-87-5    | 1556 | Waxy, green             | x | x | x |
| 5-Methyl-2-furfural                       | 620-02-0    | 1570 |                         |   |   | x |
| 3-(Methylthio)propanoic acid ethyl ester  | 13327-56-5  | 1571 | Sulfurous, onion        |   |   | x |
| 3(2H)-Furanone, 4-methoxy-2,5-dimethyl-   | 4077-47-8   | 1584 | Strawberry              |   |   | x |
| 4-Terpineol                               | 562-74-3    | 1598 | Cooling, woody, earthy  |   |   | x |
| 2-Furoic acid, ethyl ester                | 614-99-3    | 1611 |                         |   |   | x |
| 4-Decenoic acid, methyl ester             | 1191-02-2   | 1611 |                         |   |   | x |
| Butyrolactone                             | 96-48-0     | 1617 | Creamy, milky           |   |   | x |
| 2-(2-Ethoxyethoxy)-ethanol                | 111-90-0    | 1619 |                         | x | x |   |
| Hexanoic acid, 3-hydroxy-, methyl ester   | 21188-58-9  | 1631 | Pineapple, sweet        |   |   | x |
| p-Menthan-3-ol                            | 1490-04-6   | 1631 |                         | x |   |   |
| Butyric acid                              | 107-92-6    | 1637 |                         | x | x |   |
| Decanoic acid, ethyl ester                | 110-38-3    | 1638 | Sweet, apple            |   |   | x |
| Benzeneacetaldehyde                       | 122-78-1    | 1648 | Green floral, hyacinth  |   |   | x |
| 2-Methylbutanoic acid                     | 116-53-0    | 1657 | Cheesy, pungent         |   |   | x |
| 4-Decenoic acid, ethyl ester              | 7367-84-2   | 1659 |                         |   |   | x |
| Furfuryl alcohol                          | 98-00-0     | 1669 | Sweet caramel, bread    | x |   | x |
| $\alpha$ -Amorphene                       | 20085-19-2  | 1692 |                         |   |   | x |
| $\gamma$ -Caprolactone                    | 695-06-7    | 1703 | Sweet, creamy, lactonic |   |   | x |

|                                 |            |      |                          |   |   |   |
|---------------------------------|------------|------|--------------------------|---|---|---|
| Germacrene D                    | 23986-74-5 | 1705 | Woody, spice             |   |   | x |
| 1-Propanol, 3-(methylthio)-     | 505-10-2   | 1720 | Sulfureous, onion-like   |   |   | x |
| $\beta$ -Selinene               | 17066-67-0 | 1729 |                          |   |   | x |
| Nicotinic acid, methyl ester    | 93-60-7    | 1743 |                          |   |   | x |
| Naphthalene                     | 91-20-3    | 1749 |                          | x | x |   |
| 3-methyl-2(5H)-furanone         | 22122-36-7 | 1750 |                          |   | x |   |
| Methyl 5-acetoxylhexanoate      | 35234-22-1 | 1759 |                          |   |   | x |
| Benzeneacetic acid, ethyl ester | 101-97-3   | 1779 |                          |   |   | x |
| $\delta$ -Valerolactone         | 542-28-9   | 1780 |                          | x |   |   |
| $\delta$ -Pentalactone          | 542-28-9   | 1784 |                          |   | x |   |
| 2-(2-Butoxyethoxy)-ethanol      | 112-34-5   | 1796 |                          | x | x |   |
| $\delta$ -Caprolactone          | 823-22-3   | 1818 | Creamy fruity coconut    |   |   | x |
| Dodecanoic acid, ethyl ester    | 106-33-2   | 1825 | Waxy, fruity             |   |   | x |
| Hexanoic acid                   | 142-62-1   | 1839 |                          | x | x | x |
| Benzocic acid, butyl ester      | 136-60-7   | 1847 |                          | x | x |   |
| Benzyl alcohol                  | 100-51-6   | 1877 | Floral, rose             |   | x | x |
| 2-Phenyl-2-butenal              | 4411-89-6  | 1911 |                          |   |   | x |
| Phenylethyl alcohol             | 60-12-8    | 1920 | Sweet, floral, fresh     |   |   | x |
| $\beta$ -Ionone                 | 79-77-6    | 1947 | Violet-like, floral      |   |   | x |
| $\delta$ -Octalactone           | 698-76-0   | 1965 | Sweet, coconut, creamy   |   |   | x |
| 2-Acetylpyrrole                 | 1072-83-9  | 1971 | Pop-corn like            |   |   | x |
| Cinnamaldehyde                  | 104-55-2   | 2007 | Pungent, cinnamon-like   | x | x | x |
| Phenol                          | 108-95-2   | 2008 | Phenolic, plastic rubber | x | x | x |
| 1H-Pyrrole-2-carboxaldehyde     | 1003-29-8  | 2032 |                          |   |   | x |
| Furaneol                        | 3658-77-3  | 2037 | Caramellic, candy        |   |   | x |
| Octanoic acid                   | 124-07-2   | 2046 |                          | x | x | x |
| p-Cresol                        | 106-44-5   | 2089 |                          |   |   | x |
| 4-Phenyl-3-buten-2-one          | 122-57-6   | 2103 |                          |   | x | x |
| Ethyl cinnamate                 | 103-36-6   | 2108 |                          |   |   | x |
| 2-Phenoxyethanol                | 122-99-6   | 2126 |                          | x | x | x |
| Eugenol                         | 97-53-0    | 2167 | Clove                    |   |   | x |
| Nonanoic acid                   | 112-05-0   | 2173 |                          | x | x | x |
| Methyl dihydrojasmonate         | 24851-98-7 | 2237 |                          | x | x | x |
| 4H-Pyran-4-one, 2,3-dihydro-    |            |      |                          |   |   |   |
| 3,5-dihydroxy-6-methyl-         | 28564-83-2 | 2274 |                          |   |   | x |
| Decanoic acid                   | 334-48-5   | 2281 |                          | x | x |   |
| p-Allylphenol                   | 501-92-8   | 2329 |                          |   |   | x |
| Isophthalaldehyde               | 626-19-7   | 2341 |                          |   |   | x |
| Phthalide                       | 87-41-2    | 2356 |                          |   | x | x |
| Furfural                        | 84-66-2    | 2372 | Bready, brown            | x | x |   |
| 2H-Pyran-2,6(3H)-dione          | 5926-95-4  | 2427 |                          |   |   | x |
| Benzophenone                    | 119-61-9   | 2462 |                          |   |   | x |
| Dodecanoic acid                 | 143-07-7   | 2474 |                          |   | x |   |
| Vanillin                        | 121-33-5   | 2566 | Vanilla-like, sweet      |   |   | x |
| Tetradecanoic acid              | 544-63-8   | 2724 |                          | x | x | x |
| Pentadecanoic acid              | 1002-84-2  | 2822 | Waxy, fatty              | x | x | x |
| Squalene                        | 111-02-4   | 2865 |                          | x | x |   |
| Hexadecanoic acid               | 57-10-3    | 2923 |                          |   | x | x |

---

|                    |          |      |   |   |   |
|--------------------|----------|------|---|---|---|
| Heptadecanoic acid | 506-12-7 | 3027 | x | x |   |
| Octadecanoic acid  | 57-11-4  | 3120 | x | x | x |
| Oleic acid         | 112-80-1 | 3173 | x | x | x |

---
